# Supplementary material for: One-pot synthesis of micro/nano structured β-Bi2O3 with tunable morphology for highly efficient photocatalytic degradation of methylparaben under visible-light irradiation
Source: Royal Society of Chemistry journal article supplement (doi:10.1039/c5ra03200h), 2015-01-01
Supplement: c5ra03200h1.pdf [file c5ra03200h1.pdf]

## **Supplementary Information**

### **One-pot synthesis of micro/nano structured $\beta$ -Bi<sub>2</sub>O<sub>3</sub> with tunable morphology for highly efficient photocatalytic degradation of methylparaben under visible-light irradiation**

Xin Xiao\*, Ruiping Hu, Shunheng Tu, Chunxia Zheng, Huan Zhong, Xiaoxi Zuo, Junmin Nan\*

School of Chemistry and Environment, South China Normal University; Guangzhou Key Laboratory of Materials for Energy Conversion and Storage, Guangzhou 510006, PR China

Corresponding author: Xin Xiao

Tel.: +86-20-39310255

Fax: +86-20-39310187

E-mail: [xiaox@sclu.edu.cn](mailto:xiaox@sclu.edu.cn) (X. Xiao); [jmnan@sclu.edu.cn](mailto:jmnan@sclu.edu.cn) (J. Nan)

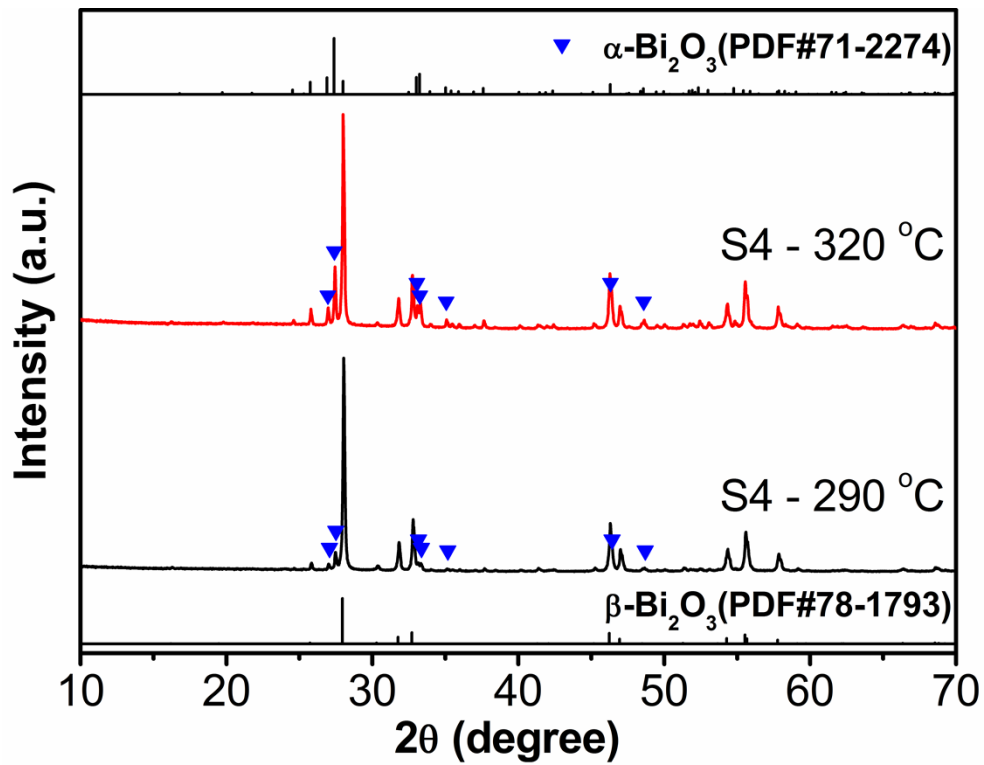

Fig. S1. XRD patterns of sample S4 after calcined at 290 and 320 °C.

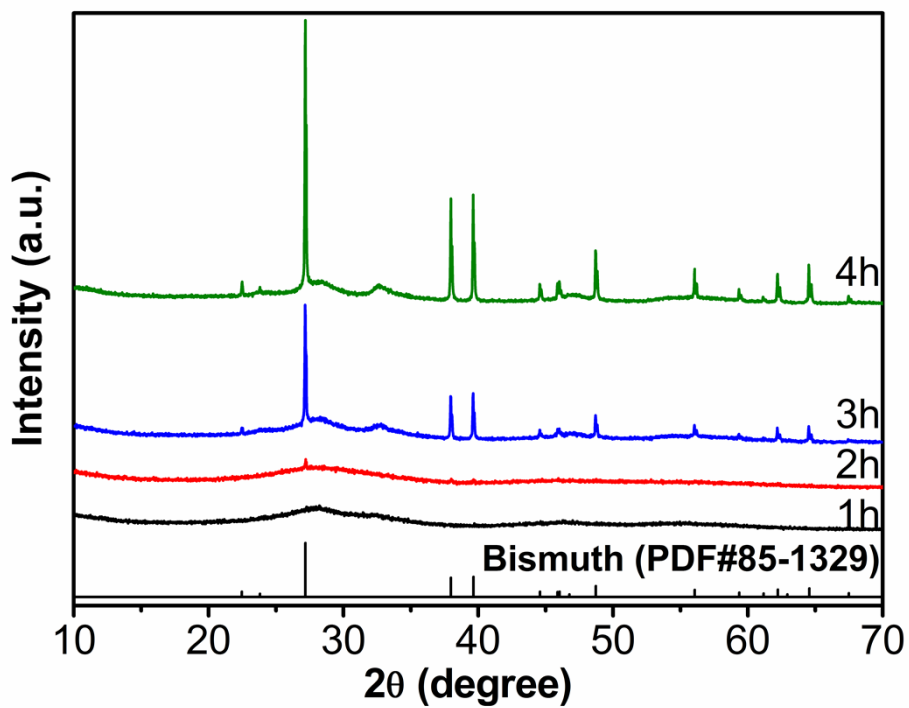

Fig. S2. XRD patterns of the precursors of sample S1 after solvothermal reaction for 1, 2, 3, and 4 h, respectively.

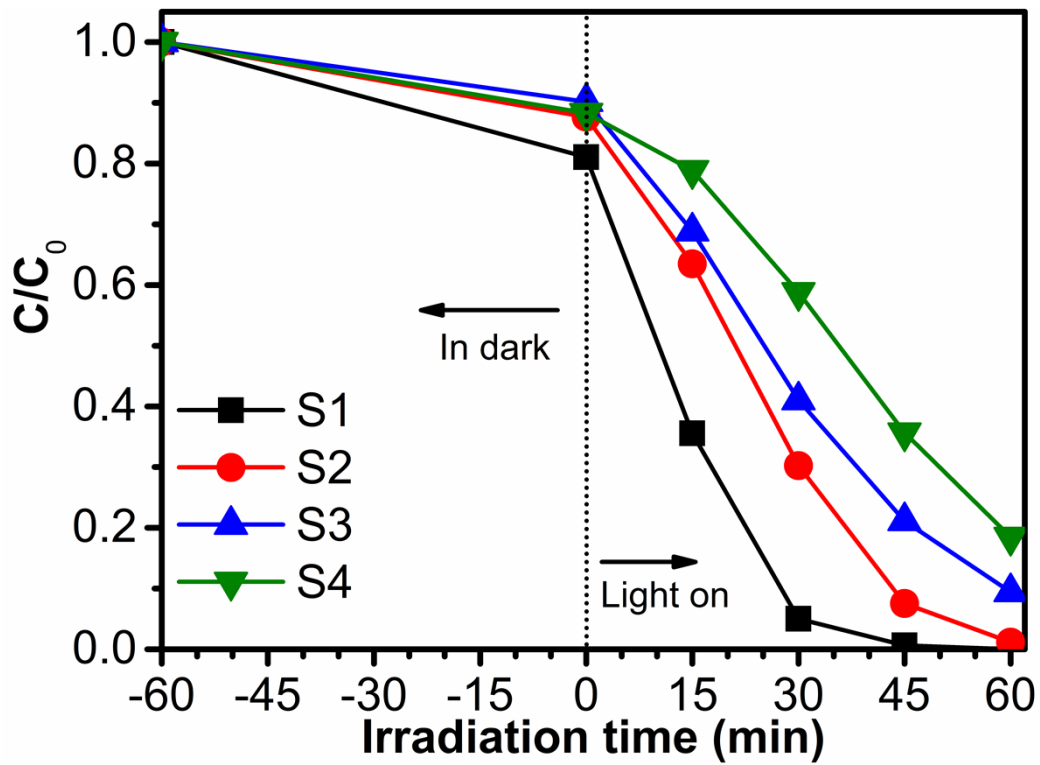

Fig. S3. Removal percentage of MeP combined by adsorption and photodegradation.

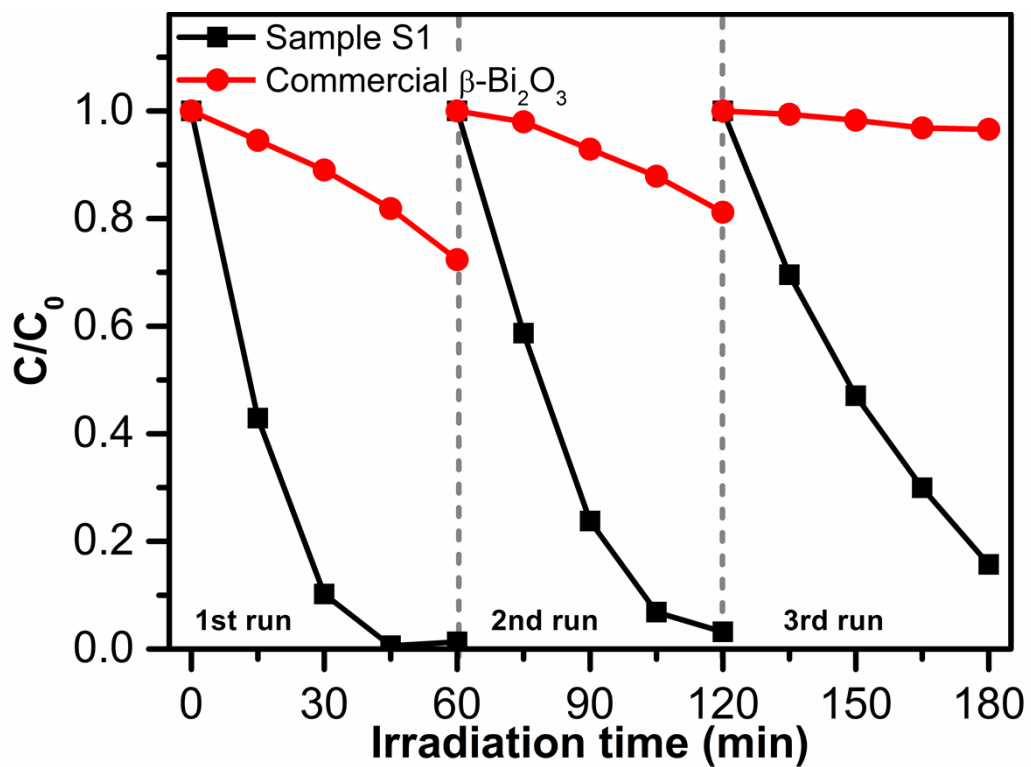

Fig. S4. Reuse of the as-synthesized sample (sample S1).

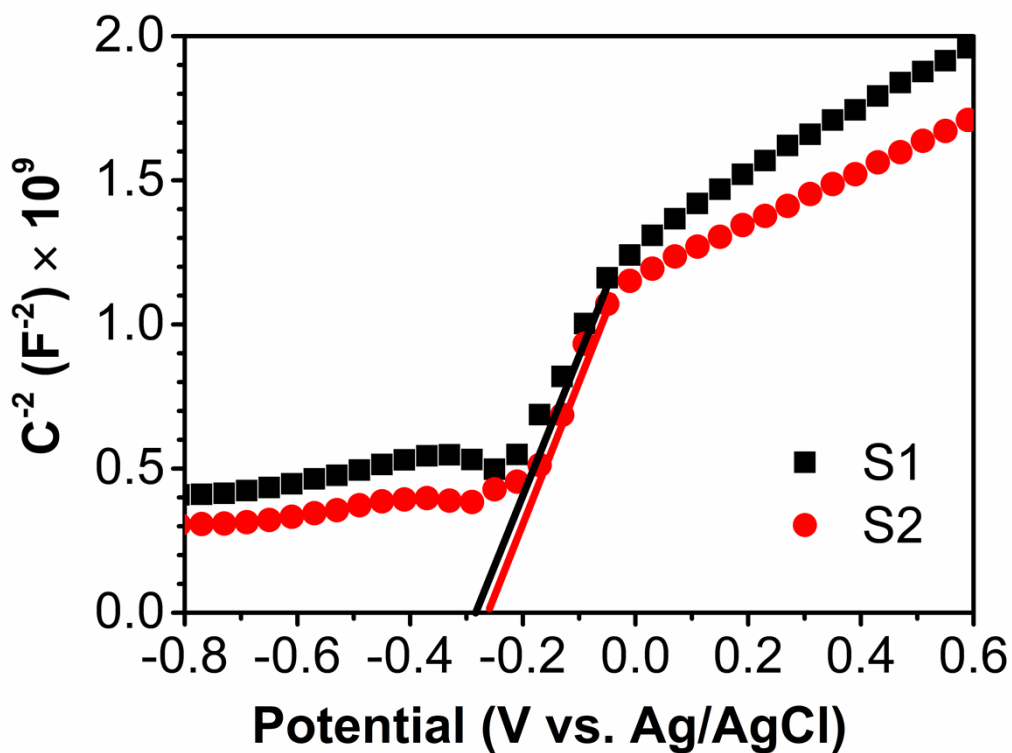

Fig. S5. Mott-Schottky plots obtained for the films electrodes prepared with as-synthesized samples S1 and S2.

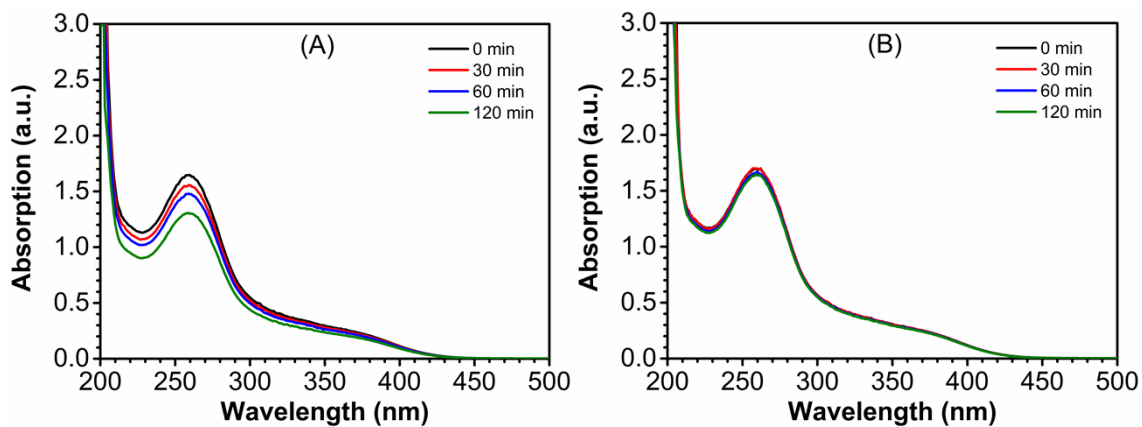

Fig. S6. Photodegradation of nitroblue tetrazolium (NBT) over as-synthesized sample S1 calcined at (A) 290 °C ( $\beta$ - $\text{Bi}_2\text{O}_3$ ) and (B) 500 °C ( $\alpha$ - $\text{Bi}_2\text{O}_3$ ) under visible-light irradiation.
